# Supplementary material for: Novel insights into transmission routes of Mycobacterium avium in pigs and possible implications for human health
Source: Springer Nature journal article supplement (doi:10.1186/1297-9716-45-46), 2014-04-17
Supplement: 13567_2014_364_MOESM3_ESM.pdf [file 13567_2014_364_MOESM3_ESM.pdf]

**MLVA *M. avium***

**Isolate no.**

**Sample**

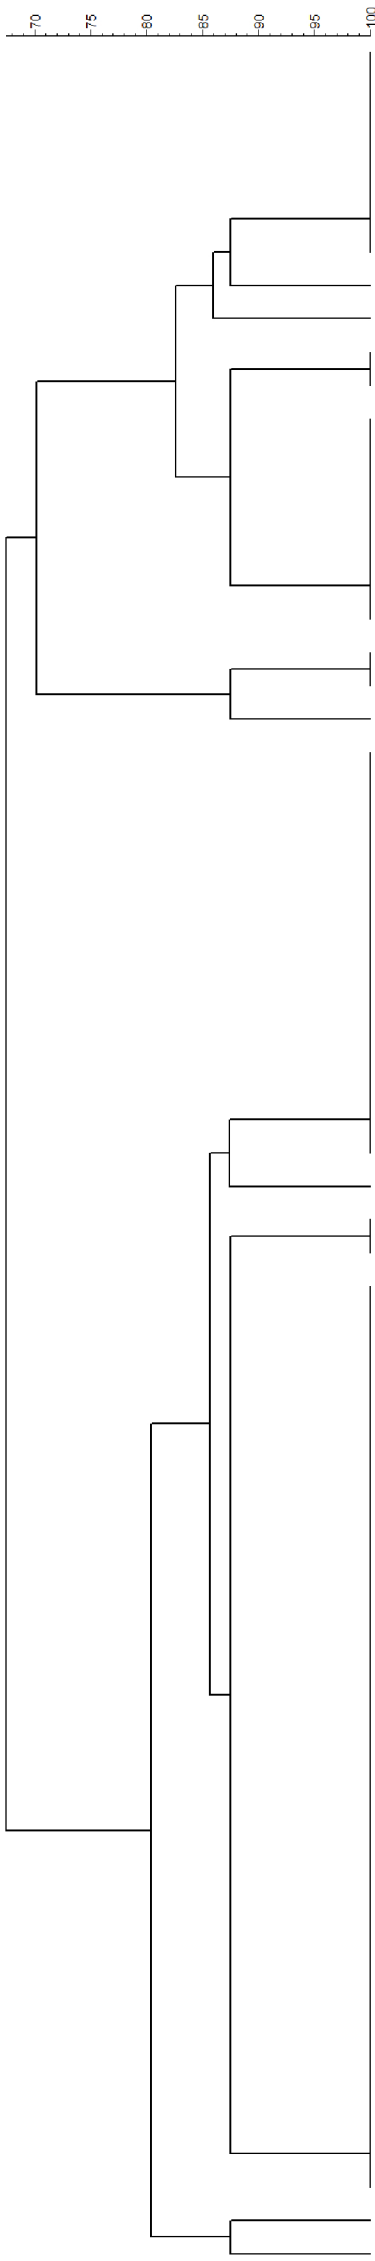

| 292 | X3 | 25 | 47 | 3 | 7 | 10 | 32 | Isolate no.      | Sample                |
|-----|----|----|----|---|---|----|----|------------------|-----------------------|
| 2   | 5  | 3  | 2  | 1 | 1 | 2  | 8  | 2012-01-8358-20A | Peat                  |
| 2   | 5  | 3  | 2  | 1 | 1 | 2  | 8  | 2013-01-1168-14  | Jejunal lymph node    |
| 2   | 5  | 3  | 2  | 1 | 1 | 2  | 8  | 2013-01-1390-13A | Mandibular lymph node |
| 2   | 5  | 3  | 2  | 1 | 1 | 2  | 8  | 2013-01-1659-17  | Mandibular lymph node |
| 2   | 5  | 3  | 2  | 1 | 1 | 2  | 8  | 2013-01-1659-21  | Mandibular lymph node |
| 2   | 5  | 3  | 2  | 1 | 1 | 2  | 8  | 2013-01-1659-8   | Mandibular lymph node |
| 2   | 5  | 3  | 2  | 1 | 1 | 2  | 8  | 2013-01-1660-23  | Jejunal lymph node    |
| 2   | 5  | 2  | 2  | 1 | 1 | 2  | 8  | 2013-01-1167-4   | Mandibular lymph node |
| 2   | 5  | 3  | 2  | 1 | 1 | 1  | 8  | 2013-01-1029-2B  | Mandibular lymph node |
| 0   | 5  | 2  | 2  | 1 | 1 | 2  | 8  | 2012-01-8358-4B  | Peat                  |
| 0   | 5  | 2  | 2  | 1 | 1 | 2  | 8  | 2013-01-1034-9   | Jejunal lymph node    |
| 0   | 5  | 3  | 2  | 1 | 1 | 2  | 8  | 2012-01-7266-142 | Faeces 8 weeks        |
| 0   | 5  | 3  | 2  | 1 | 1 | 2  | 8  | 2012-01-8358-17A | Peat                  |
| 0   | 5  | 3  | 2  | 1 | 1 | 2  | 8  | 2013-01-1029-11A | Mandibular lymph node |
| 0   | 5  | 3  | 2  | 1 | 1 | 2  | 8  | 2013-01-1167-25A | Mandibular lymph node |
| 0   | 5  | 3  | 2  | 1 | 1 | 2  | 8  | 2013-01-1168-21  | Jejunal lymph node    |
| 0   | 5  | 3  | 2  | 1 | 1 | 2  | 8  | 2013-01-1168-36  | Jejunal lymph node    |
| 0   | 5  | 3  | 2  | 1 | 1 | 2  | 8  | 2013-01-1659-14  | Mandibular lymph node |
| 0   | 4  | 3  | 3  | 1 | 1 | 2  | 8  | 2012-01-8358-18A | Peat                  |
| 0   | 4  | 3  | 3  | 1 | 1 | 2  | 8  | 2013-01-1029-26A | Mandibular lymph node |
| 0   | 4  | 3  | 2  | 1 | 1 | 2  | 8  | 2012-01-8358-15A | Peat                  |
| 2   | 4  | 2  | 2  | 1 | 1 | 2  | 8  | 2012-01-7266-17A | Faeces 8 weeks        |
| 2   | 4  | 2  | 2  | 1 | 1 | 2  | 8  | 2012-01-7266-73  | Faeces 8 weeks        |
| 2   | 4  | 2  | 2  | 1 | 1 | 2  | 8  | 2013-01-1029-36  | Mandibular lymph node |
| 2   | 4  | 2  | 2  | 1 | 1 | 2  | 8  | 2013-01-1034-26  | Jejunal lymph node    |
| 2   | 4  | 2  | 2  | 1 | 1 | 2  | 8  | 2013-01-1034-32  | Jejunal lymph node    |
| 2   | 4  | 2  | 2  | 1 | 1 | 2  | 8  | 2013-01-1167-17A | Mandibular lymph node |
| 2   | 4  | 2  | 2  | 1 | 1 | 2  | 8  | 2013-01-1168-28  | Jejunal lymph node    |
| 2   | 4  | 2  | 2  | 1 | 1 | 2  | 8  | 2013-01-1168-4   | Jejunal lymph node    |
| 2   | 4  | 2  | 2  | 1 | 1 | 2  | 8  | 2013-01-1390-2   | Mandibular lymph node |
| 2   | 4  | 2  | 2  | 1 | 1 | 2  | 8  | 2013-01-1659-11B | Mandibular lymph node |
| 2   | 4  | 2  | 2  | 1 | 1 | 2  | 8  | 2013-01-1660-12  | Jejunal lymph node    |
| 2   | 4  | 2  | 2  | 1 | 1 | 2  | 8  | 2013-01-1660-2   | Jejunal lymph node    |
| 2   | 4  | 2  | 2  | 1 | 1 | 2  | 8  | 2013-01-1660-9   | Jejunal lymph node    |
| 0   | 4  | 2  | 2  | 1 | 1 | 2  | 8  | 2013-01-1167-43  | Mandibular lymph node |
| 2   | 2  | 2  | 2  | 1 | 1 | 2  | 9  | 2012-01-7016-122 | Faeces 6 weeks        |
| 2   | 2  | 2  | 2  | 1 | 1 | 2  | 9  | 2012-01-7266-24A | Faeces 8 weeks        |
| 2   | 2  | 2  | 2  | 1 | 1 | 2  | 8  | 2012-01-7016-121 | Faeces 6 weeks        |
| 2   | 2  | 2  | 2  | 1 | 1 | 2  | 8  | 2012-01-7266-2   | Faeces 8 weeks        |
| 2   | 2  | 2  | 2  | 1 | 1 | 2  | 8  | 2012-01-8358-1   | Peat                  |
| 2   | 2  | 2  | 2  | 1 | 1 | 2  | 8  | 2012-01-8358-10A | Peat                  |
| 2   | 2  | 2  | 2  | 1 | 1 | 2  | 8  | 2012-01-8358-11  | Peat                  |
| 2   | 2  | 2  | 2  | 1 | 1 | 2  | 8  | 2012-01-8358-12A | Peat                  |
| 2   | 2  | 2  | 2  | 1 | 1 | 2  | 8  | 2012-01-8358-15B | Peat                  |
| 2   | 2  | 2  | 2  | 1 | 1 | 2  | 8  | 2012-01-8358-17B | Peat                  |
| 2   | 2  | 2  | 2  | 1 | 1 | 2  | 8  | 2012-01-8358-20C | Peat                  |
| 2   | 2  | 2  | 2  | 1 | 1 | 2  | 8  | 2012-01-8358-8A  | Peat                  |
| 2   | 2  | 2  | 2  | 1 | 1 | 2  | 8  | 2013-01-1029-18  | Mandibular lymph node |
| 2   | 2  | 2  | 2  | 1 | 1 | 2  | 8  | 2013-01-1029-32A | Mandibular lymph node |
| 2   | 2  | 2  | 2  | 1 | 1 | 2  | 8  | 2013-01-1029-8   | Mandibular lymph node |
| 2   | 2  | 2  | 2  | 1 | 1 | 2  | 8  | 2013-01-1034-21  | Jejunal lymph node    |
| 2   | 2  | 2  | 2  | 1 | 1 | 2  | 8  | 2013-01-1167-13  | Mandibular lymph node |
| 2   | 2  | 2  | 2  | 1 | 1 | 2  | 8  | 2013-01-1167-34  | Mandibular lymph node |
| 2   | 2  | 2  | 2  | 1 | 1 | 2  | 8  | 2013-01-1167-38  | Mandibular lymph node |
| 2   | 2  | 2  | 2  | 1 | 1 | 2  | 8  | 2013-01-1167-8   | Mandibular lymph node |
| 2   | 2  | 2  | 2  | 1 | 1 | 2  | 8  | 2013-01-1168-39A | Jejunal lymph node    |
| 2   | 2  | 2  | 2  | 1 | 1 | 2  | 8  | 2013-01-1168-46  | Jejunal lymph node    |
| 2   | 2  | 2  | 2  | 1 | 1 | 2  | 8  | 2013-01-1390-8A  | Mandibular lymph node |
| 2   | 2  | 2  | 2  | 1 | 1 | 2  | 8  | 2013-01-1391-13  | Jejunal lymph node    |
| 2   | 2  | 2  | 2  | 1 | 1 | 2  | 8  | 2013-01-1391-2   | Jejunal lymph node    |
| 2   | 2  | 2  | 2  | 1 | 1 | 2  | 8  | 2013-01-1391-7   | Jejunal lymph node    |
| 2   | 2  | 2  | 2  | 1 | 1 | 2  | 8  | 2013-01-1659-4A  | Mandibular lymph node |
| 2   | 2  | 2  | 2  | 1 | 1 | 2  | 8  | 2013-01-1660-15A | Jejunal lymph node    |
| 2   | 2  | 2  | 2  | 1 | 1 | 2  | 8  | 2013-01-1660-20A | Jejunal lymph node    |
| 2   | 2  | 2  | 2  | 1 | 1 | 2  | 8  | 2013-01-1660-5   | Jejunal lymph node    |
| 2   | 2  | 2  | 3  | 1 | 1 | 2  | 8  | 2013-01-1029-21  | Mandibular lymph node |
| 2   | 4  | 2  | 3  | 1 | 1 | 2  | 8  | 2013-01-1167-23A | Mandibular lymph node |
